# Supplementary material for: Leptin Overexpression as a Poor Prognostic Factor for Colorectal Cancer
Source: Hindawi journal article supplement (doi:10.1155/2020/7532514), 2020-01-01
Supplement: f1 [file 7532514.f1.pdf]

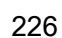

227  
228  
229  
230

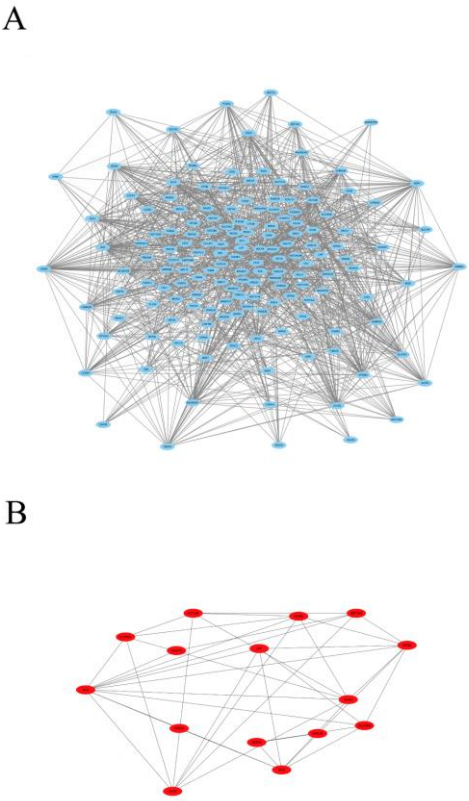

Figure S2. The PPI network is made up of the 738 overlapped differentially expressed genes. (A) The PPI network of the overlapped differentially expressed genes; (B) The PPI network of the major part of hub genes.

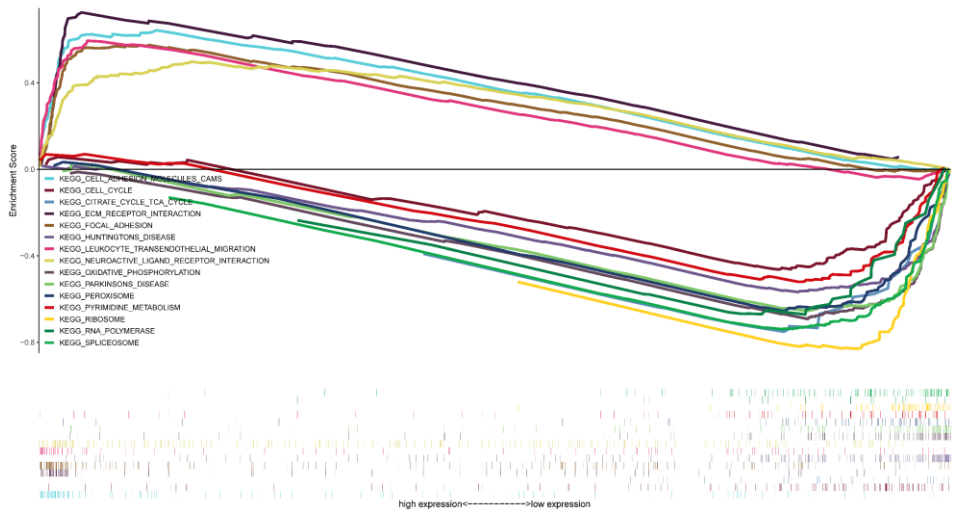

Figure S3. Gene set enrichment analysis for high leptin expression group and low leptin expression group.
